# Supplementary material for: Phosphoric acid doped imidazolium silane crosslinked poly(epichlorihydrin)/PTFE as high temperature proton exchange membranes
Source: Royal Society of Chemistry journal article supplement (doi:10.1039/c6ra10622f), 2016-01-01
Supplement: c6ra10622f1.pdf [file c6ra10622f1.pdf]

Supporting Information

**Phosphoric acid doped imidazolium silane crosslinked  
poly(epichlorohydrin)/PTFE as high temperature proton exchange  
membranes**

Jingshuai Yang<sup>1</sup>, Chao Liu<sup>1</sup>, Liping Gao, Jin Wang, Yixin Xu, Tianyu Wang,

Ronghuan He\*

Department of Chemistry, College of Sciences, Northeastern University, Shenyang

110819, China.

Email: herh@mail.neu.edu.cn. Fax: +86-24-83676698; Tel.: +86-24-83683429.

1: These authors contributed equally to this work.

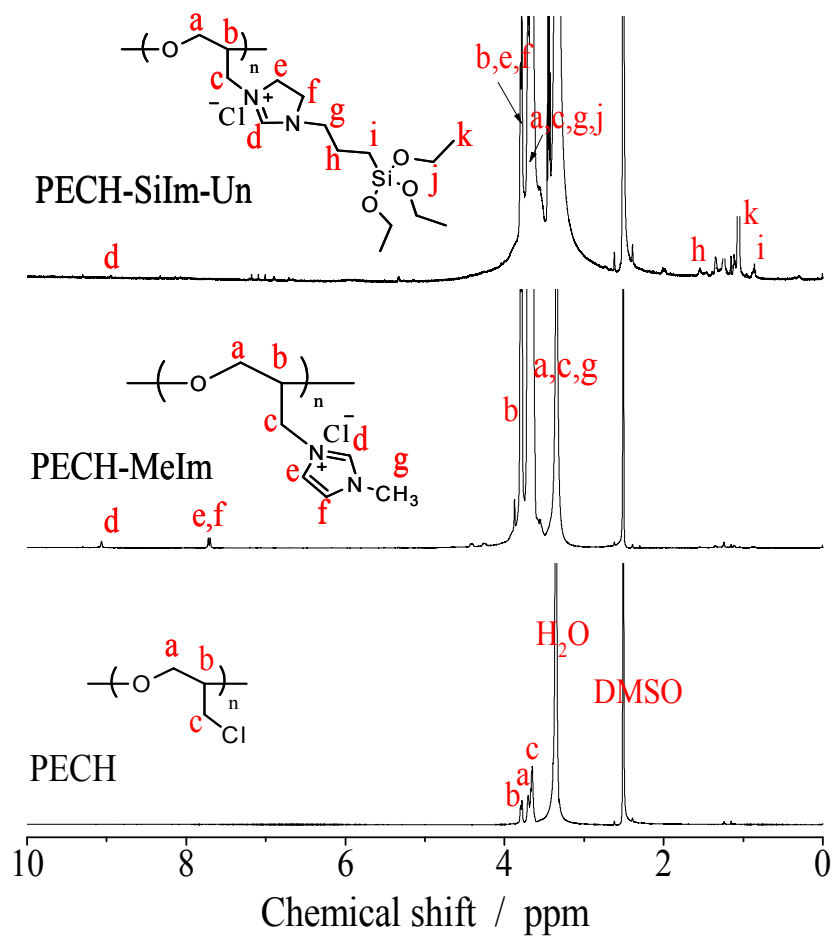

Fig. S1  $^1\text{H}$  NMR spectra of PECH, PECH-100MeIm, and un-hydrolyzed PECH-100SiIm (PECH-100SiIm-Un)
